# Supplementary material for: Sensitive Electrochemical Biosensor for Rapid Screening of Tumor Biomarker TP53 Gene Mutation Hotspot
Source: MDPI journal article supplement (doi:10.3390/bios12080658), 2022-08-19
Supplement: s1 [file s1]

# Supporting Information

## Sensitive electrochemical biosensor for rapid screening of tumor biomarker TP53 gene mutation hotspot

**Table S1.** The used oligonucleotides in this study.

| Name                       | Sequence (5'→3')                                                                   |
|----------------------------|------------------------------------------------------------------------------------|
| ssDNA                      | HS-SH-(CH <sub>2</sub> ) <sub>6</sub> -GGC ATG AAC CGG AGG CCC ATC TCA<br>TGC C-MB |
| 21nt-cDNA                  | GAT GGG CCT CCG GTT CAT GCC                                                        |
| 28nt-cDNA                  | GGCATGAGATGGGCCTCCGGTTCATGCC'                                                      |
| SBM (single base mismatch) | GAT GGG CCT CCA GTT CAT GCC                                                        |
| TBM (triple base mismatch) | GAT GGG CCT CAA ATT CAT GCC                                                        |

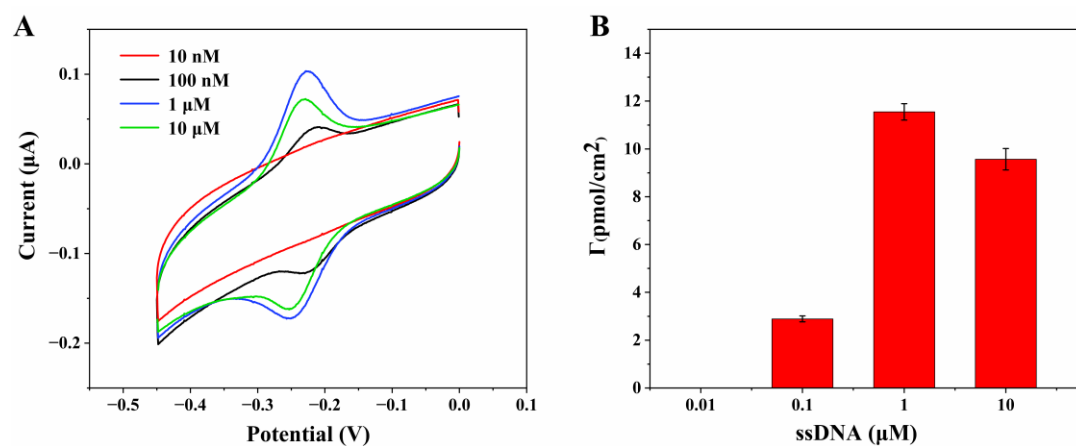

**Figure S1.** CV of a gold electrode after 16 h exposure to ssDNA at concentrations of 10 nM, 100 nM, 1  $\mu\text{M}$  and 10  $\mu\text{M}$  in pH 7.4 PBS (A), and electrode surface coverage of ssDNA probes with different concentrations (B).

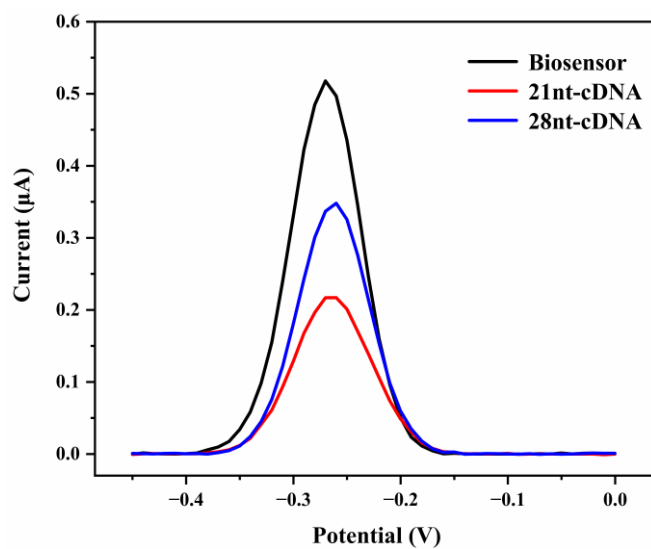

**Figure S2.** DPV curves of the electrochemical geno-sensor after 30 min hybridization to 1  $\mu\text{M}$  21 nt cDNA and 28 nt cDNA, respectively.

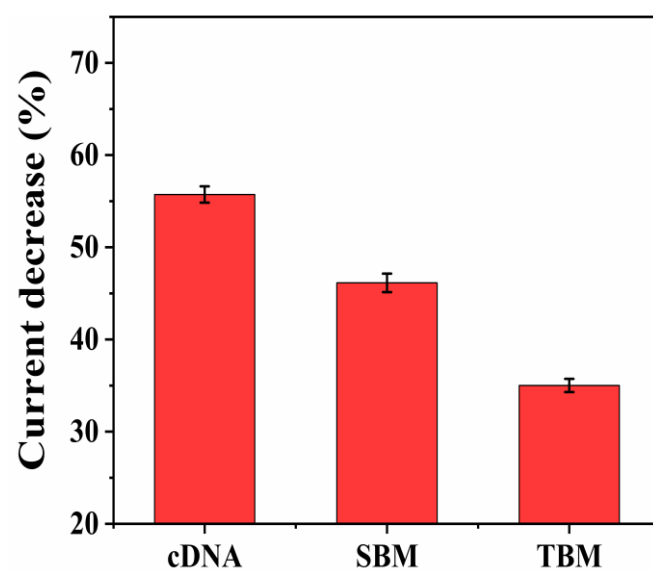

**Figure S3.** Detection capabilities of the DNA sensors for target DNA in complex systems of 50% fetal bovine serum.
